# Supplementary material for: Antenatal predictors of maternal bonding for adolescent mothers
Source: Royal Society of Chemistry journal article supplement (doi:10.1039/d0em00174k), 2008-01-01
Supplement: d0em00174k1.pdf [file d0em00174k1.pdf]

## Supporting Information

### Metallic elements and Pb isotopes in PM<sub>2.5</sub> in three Chinese typical megacities: spatial distribution and source apportionment

H.M. Xu<sup>1\*,2,3</sup>, K.L. He<sup>1</sup>, R. Feng<sup>1</sup>, Z.X. Shen<sup>1</sup>, J.J. Cao<sup>2\*</sup>, S.X. Liu<sup>2</sup>, K.F. Ho<sup>4</sup>, R.-J. Huang<sup>2</sup>, B. Guinot<sup>3</sup>, Q.Y. Wang<sup>2</sup>, J.M. Zhou<sup>2</sup>, M.X. Shen<sup>2</sup>, S. Xiao<sup>5</sup>, B.H. Zhou<sup>6</sup>, J.E. Sonke<sup>7</sup>

#### *Sampling sites description*

#### *Table captions*

**Table S1** Meteorological parameters (mean $\pm$ 1 $\sigma$ ) of the studied three cities in China during PM<sub>2.5</sub> sampling period.

**Table S2** AQI and the concentrations of gas pollutants (CO, SO<sub>2</sub>, NO<sub>2</sub>, and O<sub>3</sub>) in the studied three cities during PM<sub>2.5</sub> sampling period.

**Table S3** Minimum detection limits (MDL) and levels of blank samples of the 40 elements detected in this study.

**Table S4** Mean ( $\pm$ 1 $\sigma$ ) mass concentrations of PM<sub>2.5</sub> ( $\mu\text{g m}^{-3}$ ) and bounded elements ( $\text{ng m}^{-3}$ ) in the studied three cities.

#### *Figure caption*

**Figure S1** Percentages of coal and natural gas in total energy consumption in Beijing from 2010 to 2014.

## 24 *Sampling sites description*

25 **Beijing**, the capital of China, is one of the world's most populous cities with a  
26 population of over 20 million in an area of 16,410 km<sup>2</sup>. It is located in the northern  
27 part of the country with a typical continental monsoon climate. Annual rainfall  
28 averages nearly 700 mm, most of it comes in July and August. The average  
29 temperature throughout the whole year is 11.7 °C. Winter is dry and cold. Beijing is  
30 also located in a basin with multiple emission sources, promoting accumulation of air  
31 pollutants and limiting their dispersion. Coal burning accounts for about 40% of PM<sub>2.5</sub>  
32 in Beijing before 2012. Since 2012, the city has been converting coal-fired power  
33 stations to burn natural gas. The percentages of coal in total energy consumption was  
34 decreasing from 29.6% to 20.4% in Beijing from 2010 to 2014, and natural gas was  
35 increasing from 14.6% to 21.1%, as shown in Figure S1. At the end of 2013, the  
36 number of motor vehicles in Beijing was 5.437 million.<sup>1</sup> PM<sub>2.5</sub> was sampled on the  
37 roof of an experimental building in the Tower Division of the Institute of  
38 Atmospheric Physics, Chinese Academy of Sciences (N 39.59°, E 116.22°).

39 **Changchun**, the capital city of Jilin province, is an industrial city, with a  
40 population of ~8 million in 2013 in an area of 20,565 km<sup>2</sup>. Changchun belongs to the  
41 temperate continental semi-humid monsoon climate type, on a flat plain in northeast  
42 China. It is characterized by four distinct seasons. Winter is long (lasting from  
43 November to March), cold, and windy with a January mean temperature of -15.1 °C.  
44 And the average of air temperature in five months of the year is below 0 °C.  
45 Changchun is an old industrial base in China with a solid industrial foundation and a  
46 cradle for the industrial development of automobiles, rail cars, optoelectronic  
47 information, and applied chemistry. In 2013, the total output value of industrial  
48 enterprises above designated size was 921.34 billion CNY. Among them, the total  
49 output value of the automobile manufacturing industry was 549.26 billion CNY,  
50 accounting for 59.6%. In 2014, the coal consumption in Changchun was 25.8 million  
51 tons of standard coal, accounting for ~70% of total energy consumption. At the end of  
52 2013, the number of motor vehicles was 1.445 million in Changchun.<sup>2</sup> PM<sub>2.5</sub> was

53 sampled on the roof of the building in Changchun Meteorological Bureau (N 43.54°,  
54 E 125.13°).

55 **Chengdu**, the capital city of Sichuan province, is located at the western edge of  
56 the Sichuan Basin, with a population of over 14 million in an area of 14,312 km<sup>2</sup>. It  
57 has a mild, humid, subtropical climate with the annual average temperature of 16 °C  
58 and rainfall of ~1000 mm. Chengdu has one of the lowest annual sunshine totals  
59 nationally with monthly percent possible sunshine ranging from 16% in December to  
60 38% in August. The city receives 1,073 hours of bright sunshine annually. Chengdu  
61 achieved a gross domestic product (GDP) of 910.89 billion CNY in 2013, an increase  
62 of 10.2% over the previous year. In 2012, coal consumption in Chengdu was 8.591  
63 million tons of standard coal, accounting for ~25% of total energy consumption. At  
64 the end of 2013, the number of motor vehicles in Chengdu was 3.386 million,  
65 increasing at 366% and 30% compared to 2000 and 2010, respectively.<sup>3</sup> Chengdu is  
66 the fastest growing city in China.<sup>4</sup> PM<sub>2.5</sub> was sampled on the roof of the building in  
67 the Institute of Plateau Meteorology, China Meteorological Administration (N 30.39°,  
68 E 104.00°).

69 Moreover, the meteorological parameters and air quality indexes of each  
70 sampling site are shown in Tables S1 and S2.

71

## 72 **Reference**

- 73 1. Beijing Statistical Yearbook. Statistics Communique on the National Economy and Social  
74 Development of the City of Beijing. Beijing Municipal Bureau of Statistics and NBS Survey  
75 Office in Beijing. China Statistics Press, 2014.
- 76 2. Changchun Statistical Yearbook. Statistics Communique on the National Economy and Social  
77 Development of the City of Changchun. Changchun Municipal Bureau of Statistics and NBS  
78 Survey Office in Changchun. China Statistics Press, 2014.
- 79 3. Chengdu Statistical Yearbook. Statistics Communique on the National Economy and Social  
80 Development of the City of Chengdu. Chengdu Municipal Bureau of Statistics and NBS  
81 Survey Office in Chengdu. China Statistics Press, 2014.
- 82 4. Blue book of world cities. Annual report on world cities (2018) No.7. Social Sciences  
83 Academic Press (China), 2018.

84

85 **Table S1** Meteorological parameters (mean $\pm$ 1 $\sigma$ ) of the studied three cities in China  
 86 during PM<sub>2.5</sub> sampling period\*.

|           | Temperature<br>(°C) | Sunlight<br>time (h) | RH<br>(%)       | Pressure<br>(hPa) | Boundary<br>layer height<br>(m) | Visibility<br>(km) | Wind<br>speed<br>(km h <sup>-1</sup> ) |
|-----------|---------------------|----------------------|-----------------|-------------------|---------------------------------|--------------------|----------------------------------------|
| Beijing   | -0.8 $\pm$ 2.5      | 192.4                | 36.8 $\pm$ 16.2 | 1025.3 $\pm$ 6.7  | 1080 $\pm$ 207                  | 10.4 $\pm$ 7.6     | 10.1 $\pm$ 5.4                         |
| Changchun | -14.2 $\pm$ 4.5     | 198.3                | 57.9 $\pm$ 8.1  | 1022.8 $\pm$ 8.1  | 892 $\pm$ 185                   | 8.0 $\pm$ 3.8      | 12.0 $\pm$ 4.6                         |
| Chengdu   | 8.0 $\pm$ 2.1       | 98.1                 | 69.1 $\pm$ 9.3  | 1023.2 $\pm$ 5.2  | 707 $\pm$ 163                   | 4.2 $\pm$ 2.0      | 3.9 $\pm$ 1.8                          |

87 \*The meteorological parameters including temperature, sunlight time, relative humidity (RH),  
 88 pressure, visibility, and wind speed during the sampling periods were obtained from the  
 89 meteorological bureau of each city. Boundary layer height data were obtained from dataset of  
 90 “ERA5 monthly averaged data on single levels from 1979 to present” in ECMWF  
 91 ([https://cds.climate.copernicus.eu/cdsapp#!/dataset/reanalysis-era5-single-levels-monthly-](https://cds.climate.copernicus.eu/cdsapp#!/dataset/reanalysis-era5-single-levels-monthly-means?tab=form)  
 92 means?tab=form).

93

94 **Table S2** AQI and the concentrations of gas pollutants (CO, SO<sub>2</sub>, NO<sub>2</sub>, and O<sub>3</sub>) in the  
95 studied three cities during PM<sub>2.5</sub> sampling period\*.

|           | AQI | CO<br>(mg m <sup>-3</sup> ) | SO <sub>2</sub><br>(μg m <sup>-3</sup> ) | NO <sub>2</sub><br>(μg m <sup>-3</sup> ) | O <sub>3</sub><br>(μg m <sup>-3</sup> ) |
|-----------|-----|-----------------------------|------------------------------------------|------------------------------------------|-----------------------------------------|
| Beijing   | 122 | 2                           | 51                                       | 58                                       | 20                                      |
| Changchun | 118 | 1                           | 68                                       | 50                                       | 34                                      |
| Chengdu   | 212 | 2                           | 35                                       | 86                                       | 22                                      |

96 \*AQI (Air Quality Index), CO, SO<sub>2</sub>, NO<sub>2</sub>, and O<sub>3</sub> in Beijing, Changchun and Chengdu were retrieved  
97 from the Real-time Monitoring Platform of Chinese Air Quality (<https://www.aqistudy.cn/>).

98

**Table S3** Minimum detection limits (MDL) and levels of blank samples of the 40 elements detected in this study.

| Element | MDL<br>(ng m <sup>-3</sup> ) | Acid blank<br>(ng m <sup>-3</sup> ) | Field blanks (ng m <sup>-3</sup> ) |           |           |
|---------|------------------------------|-------------------------------------|------------------------------------|-----------|-----------|
|         |                              |                                     | Beijing                            | Changchun | Chengdu   |
| Na      | 6.06                         | 1.90                                | 74.4                               | 117       | 76.1      |
| Mg      | 0.0702                       | 1.47                                | 6.29                               | 16.7      | 7.19      |
| Al      | 0.0998                       | 1.10                                | 4.54                               | 21.5      | 5.31      |
| Ca      | 0.187                        | 17.1                                | 81.3                               | 89.8      | 47.5      |
| Ti      | 0.0222                       | 0.0747                              | 0.115                              | 0.543     | 0.105     |
| V       | 0.000425                     | 0.00941                             | 0.00802                            | 0.0788    | 0.00954   |
| Cr      | 0.000189                     | 0.636                               | 0.361                              | 1.20      | 0.925     |
| Mn      | 0.00713                      | 0.108                               | 0.0241                             | 0.937     | 0.0589    |
| Fe      | 0.0666                       | 3.51                                | 1.21                               | 31.2      | 3.11      |
| Co      | 0.00134                      | 0.0179                              | 0.00238                            | 0.0207    | 0.00768   |
| Ni      | 0.162                        | 1.42                                | 0.417                              | 0.707     | 0.672     |
| Cu      | 0.00475                      | 0.114                               | 0.121                              | 2.91      | 0.139     |
| Zn      | 0.0152                       | 0.199                               | 1.06                               | 8.72      | 0.948     |
| Rb      | 0.00209                      | 0.010                               | 0.0149                             | 0.110     | 0.00677   |
| Sr      | 0.00909                      | 0.0557                              | 0.129                              | 0.344     | 0.0846    |
| Zr      | 0.00688                      | 0.000557                            | 0.0251                             | 0.0910    | 0.0203    |
| Nb      | 0.000424                     | 0.00230                             | 0.00631                            | 0.0335    | 0.0205    |
| Mo      | 0.0218                       | 0.0851                              | 0.238                              | 0.326     | 0.257     |
| Cd      | 0.000669                     | 0.000886                            | 0.00128                            | 0.0447    | 0.00247   |
| Sn      | 0.00584                      | 0.155                               | 0.271                              | 0.176     | 0.338     |
| Sb      | 0.00388                      | 0.0239                              | 0.0220                             | 0.185     | 0.0276    |
| Ba      | 0.00110                      | 0.0365                              | 0.267                              | 1.610     | 0.639     |
| La      | 0.000149                     | 0.000808                            | 0.00292                            | 0.0126    | 0.00190   |
| Ce      | 0.000223                     | 0.000859                            | 0.00385                            | 0.0251    | 0.00245   |
| Pr      | 0.000108                     | 0.000108                            | 0.000547                           | 0.00303   | 0.000400  |
| Nd      | 0.000161                     | 0.000528                            | 0.00170                            | 0.0117    | 0.00143   |
| Sm      | 0.000208                     | 0.000197                            | 0.000569                           | 0.00220   | 0.000429  |
| Eu      | 0.000146                     | 0.000236                            | 0.000277                           | 0.000855  | 0.000196  |
| Gd      | 0.0000943                    | 0.000224                            | 0.000620                           | 0.00223   | 0.000260  |
| Tb      | 0.000143                     | 0.0000278                           | 0.000140                           | 0.000320  | 0.000104  |
| Dy      | 0.0000944                    | 0.000132                            | 0.000612                           | 0.00204   | 0.000577  |
| Ho      | 0.0000676                    | 0.0000343                           | 0.000136                           | 0.000405  | 0.0000636 |
| Er      | 0.0000920                    | 0.0000576                           | 0.000341                           | 0.000908  | 0.000332  |
| Tm      | 0.0000504                    | 0.0000451                           | 0.0000409                          | 0.000133  | 0.0000391 |
| Yb      | 0.0000429                    | 0.0000677                           | 0.000271                           | 0.000963  | 0.000197  |
| Lu      | 0.0000539                    | 0.0000275                           | 0.0000649                          | 0.000122  | 0.0000651 |
| Tl      | 0.000482                     | 0.00164                             | 0.00400                            | 0.0281    | 0.00140   |
| Pb      | 0.00192                      | 0.0130                              | 0.0520                             | 2.05      | 0.0415    |

|    |           |           |          |         |          |
|----|-----------|-----------|----------|---------|----------|
| Th | 0.00189   | 0.000159  | 0.000896 | 0.00234 | 0.000319 |
| U  | 0.0000414 | 0.0000947 | 0.00263  | 0.00497 | 0.00174  |

101

102

103 **Table S4** Mean ( $\pm 1\sigma$ ) mass concentrations of PM<sub>2.5</sub> ( $\mu\text{g m}^{-3}$ ) and bounded elements  
 104 ( $\text{ng m}^{-3}$ ) in the studied three cities.

|                    | Beijing |        | Changchun |        | Chengdu |        |
|--------------------|---------|--------|-----------|--------|---------|--------|
|                    | Mean    | Stdev* | Mean      | Stdev* | Mean    | Stdev* |
| PM <sub>2.5</sub>  | 171     | 59.7   | 162       | 65.8   | 171     | 63.1   |
| $\Sigma$ Element** | 1145    | 710    | 1272      | 991    | 857     | 291    |
| Na                 | 181     | 97.5   | 142       | 91.8   | 123     | 35.5   |
| Mg                 | 107     | 86.5   | 82.9      | 109    | 38.5    | 17.6   |
| Al                 | 161     | 146    | 280       | 306    | 134     | 82.2   |
| Ca                 | 293     | 285    | 325       | 297    | 247     | 113    |
| Ti                 | 5.25    | 4.44   | 8.30      | 6.48   | 4.05    | 1.94   |
| V                  | 0.784   | 0.292  | 0.876     | 0.493  | 0.531   | 0.215  |
| Cr                 | 2.16    | 1.09   | 2.18      | 1.79   | 2.29    | 2.46   |
| Mn                 | 12.5    | 4.94   | 11.3      | 7.88   | 12.0    | 4.15   |
| Fe                 | 237     | 150    | 218       | 190    | 167     | 64.2   |
| Co                 | 0.213   | 0.087  | 0.194     | 0.115  | 0.221   | 0.192  |
| Ni                 | 1.27    | 0.424  | 1.12      | 0.886  | 4.64    | 11.8   |
| Cu                 | 17.4    | 9.22   | 7.92      | 9.76   | 10.8    | 4.42   |
| Zn                 | 69.9    | 40.1   | 142       | 99.2   | 72.1    | 29.6   |
| Rb                 | 1.37    | 0.565  | 0.891     | 0.490  | 1.05    | 0.358  |
| Sr                 | 7.43    | 15.0   | 5.03      | 11.9   | 1.74    | 0.907  |
| Zr                 | 0.211   | 0.133  | 0.313     | 0.208  | 0.135   | 0.058  |
| Nb                 | 0.066   | 0.042  | 0.109     | 0.078  | 0.040   | 0.030  |
| Mo                 | 0.592   | 0.361  | 1.80      | 1.85   | 0.605   | 0.287  |
| Cd                 | 0.689   | 0.421  | 0.414     | 0.219  | 0.917   | 0.482  |
| Sn                 | 1.85    | 0.794  | 1.94      | 0.863  | 7.27    | 8.20   |
| Sb                 | 2.63    | 1.57   | 2.01      | 1.02   | 2.39    | 1.11   |
| Ba                 | 26.6    | 51.7   | 21.6      | 55.7   | 7.34    | 4.64   |
| La                 | 0.208   | 0.152  | 0.234     | 0.203  | 0.080   | 0.040  |
| Ce                 | 0.340   | 0.318  | 0.463     | 0.426  | 0.151   | 0.079  |
| Pr                 | 0.035   | 0.038  | 0.049     | 0.049  | 0.016   | 0.009  |
| Nd                 | 0.130   | 0.141  | 0.190     | 0.185  | 0.061   | 0.034  |
| Sm                 | 0.023   | 0.023  | 0.035     | 0.033  | 0.012   | 0.007  |
| Eu                 | 0.006   | 0.006  | 0.008     | 0.009  | 0.003   | 0.002  |
| Gd                 | 0.021   | 0.022  | 0.034     | 0.031  | 0.012   | 0.006  |
| Tb                 | 0.003   | 0.003  | 0.005     | 0.004  | 0.002   | 0.001  |
| Dy                 | 0.017   | 0.016  | 0.028     | 0.024  | 0.009   | 0.005  |
| Ho                 | 0.003   | 0.003  | 0.005     | 0.004  | 0.002   | 0.001  |
| Er                 | 0.008   | 0.007  | 0.014     | 0.011  | 0.004   | 0.002  |
| Tm                 | 0.001   | 0.001  | 0.002     | 0.001  | 0.001   | 0.000  |
| Yb                 | 0.007   | 0.006  | 0.012     | 0.009  | 0.004   | 0.002  |
| Lu                 | 0.001   | 0.001  | 0.002     | 0.001  | 0.001   | 0.000  |



|    |       |       |       |       |       |       |
|----|-------|-------|-------|-------|-------|-------|
| Tl | 0.378 | 0.167 | 0.226 | 0.066 | 0.208 | 0.075 |
| Pb | 31.3  | 17.4  | 14.7  | 11.5  | 18.8  | 6.50  |
| Th | 0.025 | 0.032 | 0.039 | 0.042 | 0.015 | 0.008 |
| U  | 0.025 | 0.012 | 0.048 | 0.021 | 0.020 | 0.006 |

---

105 \* Standard deviation.

106 \*\* Sum concentration of all tested elements (40) in the table.

107

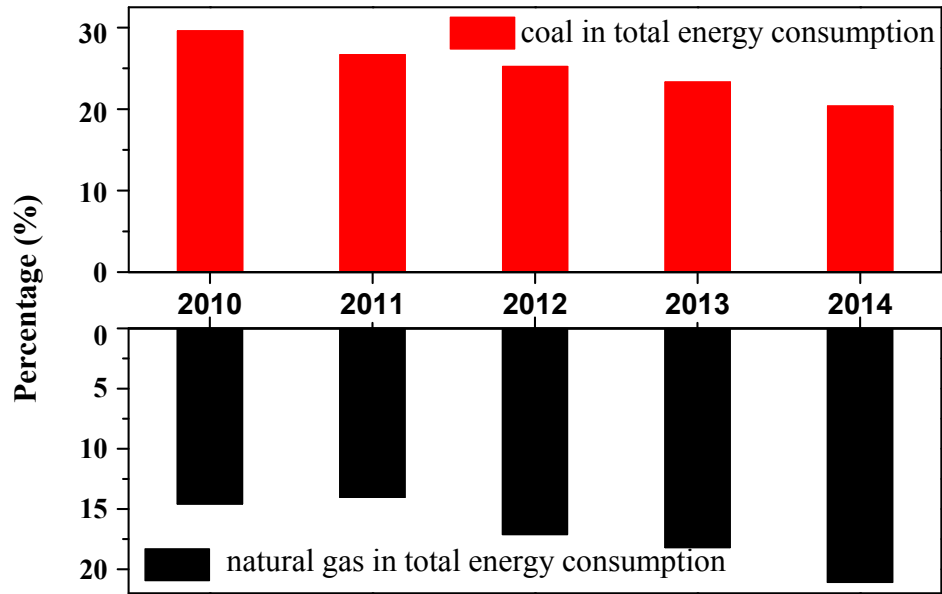

108

109 **Figure S1** Percentages of coal and natural gas in total energy consumption in Beijing  
 110 from 2010 to 2014.
